# Supplementary material for: Amine grafted silica supported CrAuPd alloy nanoparticles: superb heterogeneous catalysts for the room temperature dehydrogenation of formic acid
Source: Royal Society of Chemistry journal article supplement (doi:10.1039/c5cc02371h), 2015-01-01
Supplement: c5cc02371h1.pdf [file c5cc02371h1.pdf]

**Amine Grafted Silica Supported CrAuPd Alloy  
Nanoparticles: A Superb Heterogeneous Catalyst for the  
Room Temperature Dehydrogenation of Formic Acid**

(Supporting Information)

Mehmet Yurderi, Ahmet Bulut, Nurdan Caner, Metin Celebi, Murat Kaya, Mehmet  
Zahmakiran

*(References cited here are independent of the main manuscript)*

### *S.1 Materials*

Palladium(II) nitrate dihydrate ( $\text{Pd}(\text{NO}_3)_2 \cdot 2\text{H}_2\text{O}$ ) (~ 40 % Pd basis), chromium(II) nitrate nonahydrate ( $\text{Cr}(\text{NO}_3)_3 \cdot 9\text{H}_2\text{O}$ ), gold(III) chloride trihydrate nitrate ( $\text{AuCl}_3 \cdot 3\text{H}_2\text{O}$ ), aminopropyltriethoxysilane (APTS;  $\text{H}_2\text{N}(\text{CH}_2)_3\text{Si}(\text{OC}_2\text{H}_5)_3$ ), sodium borohydride ( $\text{NaBH}_4$ ), ninhydrin ( $\text{C}_9\text{H}_6\text{O}_4$ ), toluene ( $\text{C}_7\text{H}_8$ ) and sodium hydroxide ( $\text{NaOH}$ ) were purchased from Sigma-Aldrich<sup>®</sup>. Formic acid ( $\text{CH}_2\text{O}_2$ ), and silica gel (230-400 mesh) were purchased from Merck<sup>®</sup>. Toluene was distilled over sodium and stored in a Labsconco nitrogen-atmosphere drybox ( $\text{O}_2 < 1\text{ppm}$ ). Deionized water was distilled by water purification system (Milli-Q Water Purification System). All glassware and Teflon-coated magnetic stir bars were washed with acetone and copiously rinsed with distilled water before drying in an oven at 423 K.

### *S.2 Characterization*

Cr, Au and Pd contents of the samples were determined by ICP-OES (Leeman, Direct Reading Echelle) after each sample was completely dissolved in a mixture of  $\text{HNO}_3/\text{HCl}$  (1/3 v/v). Powder X-ray diffraction (XRD) patterns were recorded with a MAC Science MXP 3TZ diffractometer using  $\text{Cu-K}\alpha$  radiation (wavelength 1.54 Å, 40 kV, 55 mA). CTEM, HRTEM, STEM, and HAADF-STEM samples were prepared by dropping one drop of dilute suspension on copper coated carbon TEM grid and the solvent was then dried. The conventional TEM was carried out on a JEOL JEM-200CX transmission electron microscopes operating at 120 kV. HRTEM, STEM and HAADF-STEM were run on a JEOL JEM-2010F transmission electron microscope operating at 200 kV. Oxford EDXS system and Inca software were used to collect and process STEM-EDX data. The XPS analyses were performed on a Physical Electronics 5800 spectrometer equipped with a hemispherical analyzer and using monochromatic  $\text{Al-K}\alpha$  radiation (1486.6 eV, the X-ray tube working at 15 kV and 350 W, and pass energy of 23.5 eV). The gas generated from the decomposition of formic acid was analyzed by FID-2014 and TCD-2014GC analyzers (Shimadzu). UV-Vis

electronic absorption spectra were recorded on a Shimadzu UV-2600 spectrophotometer. FTIR spectra of the samples were taken from a Shimadzu IR Affinity by using modulated gas chambers.

### *S.3 Preparation of Amine Functionalized Silica (N-SiO<sub>2</sub>)*

The functionalization of the silica was carried out by adding a desired amount of APTS to 30 mL of dry toluene containing 500 mg of silica. The resulting slurry was allowed to stir for 12 h. The white solid was filtered and washed repeatedly with toluene. The white amine-functionalized silica (N-SiO<sub>2</sub>) was dried in a vacuum oven (100 °C and 10<sup>-1</sup> Torr) and used for further application. The presence of NH<sub>2</sub> groups on SiO<sub>2</sub> was confirmed by ATR-IR and quantified by the colorimetric ninhydrin method.<sup>[1]</sup>

### *S.4 Preparation of CrAuPd/N-SiO<sub>2</sub> (Cr: Au: Pd = 0.15:0.25:0.60) Catalyst*

CrAuPd/N-SiO<sub>2</sub> catalyst was simply and reproducibly prepared through the conventional impregnation and subsequent reduction method.<sup>[2]</sup> Typically, 5.0 mL aqueous solution containing Pd(NO<sub>3</sub>)<sub>2</sub>·2H<sub>2</sub>O (7.13 mg, 26.7 μmol Pd), Cr(NO<sub>3</sub>)<sub>3</sub>·9H<sub>2</sub>O (2.68 mg, 6.7 μmol Cr), AuCl<sub>3</sub>·3H<sub>2</sub>O (4.37 mg, 11.0 μmol Au) and N-SiO<sub>2</sub> (100 mg, 98 μmol NH<sub>2</sub>) is mixed for 3 hours. Then, the fresh 1.0 mL aqueous solution of NaBH<sub>4</sub> (28 mg, 0.7 mmol) was added to this mixture and the resulting solution was stirred for half an hour under air at room temperature. After centrifugation (6000 rpm, 5 min.), copious washing with water (3 x 20 mL), filtration, and drying in oven at 373 K, CrAuPd/N-SiO<sub>2</sub> catalyst was obtained as dark gray powders.

### *S.5 Activity Measurements*

The catalytic activity of CrAuPd/N-SiO<sub>2</sub> in the dehydrogenation of FA was determined by measuring the rate of hydrogen generation. The volume of released gas during the reaction

---

[1] I. Taylor, A. G. Howard, *Anal. Chim. Acta* **1993**, 271, 77.

[2] R. J. White, R. Luque, V. L. Budarin, J. H. Clark, D. J. Macquarrie, *Chem. Soc. Rev.* **2009**, 38, 481.

was monitored using the gas burette by water displacement.<sup>[3]</sup> Before starting the catalytic activity test, a jacketed one necked reaction flask (50.0 mL) containing a Teflon-coated stir bar was placed on a magnetic stirrer (Heidolph MR-3004) and thermostated to 298 K by circulating water through its jacket from a constant temperature bath (Lab Companion RW-0525). In a typical experiment, CrAuPd/N-SiO<sub>2</sub> catalyst was weighed and transferred into the reaction flask, and then 9.0 mL H<sub>2</sub>O was added into the reaction reaction flask and this mixture was stirred for 15 min. to achieve thermal equilibrium. Next, 0.5 mL aqueous FA solution (75  $\mu$ L FA in 0.425 mL H<sub>2</sub>O) was added into the reaction flask via its septum by using a 1.0 mL gastight syringe and the catalytic reaction was started ( $t = 0$  min) by stirring the mixture at 600 rpm.

### *S.6 Catalytic Selectivity*

The selectivity of CrAuPd/N-SiO<sub>2</sub> catalyst in the decomposition of FA was investigated by GC, FTIR analyses and NaOH-trap experiment. The gas generated over PdAg-MnO<sub>x</sub>/SiO<sub>2</sub>-NH<sub>2</sub> catalyzed dehydrogenation of aqueous FA solution (10.0 mL of 0.3 M) was collected separately in GC analyzing balloon and FTIR-gas cell, which were then analyzed in GC and FTIR by using pure CO, H<sub>2</sub> and CO<sub>2</sub> as reference gases. NaOH-trap experiments were performed to determine the molar ratio of CO<sub>2</sub> to H<sub>2</sub> in the product mixture generated during the CrAuPd/N-SiO<sub>2</sub> catalyzed decomposition of aqueous FA solution (10 mL of 0.20 M).<sup>[4]</sup> In these experiments, the trap (10.0 M NaOH solution) was placed between the jacketed reactor and gas burette. The generated gas during the reaction was passed through the NaOH trap where CO<sub>2</sub> was captured (**1**). Next, the volume of the gas generated from the dehydrogenation of FA was monitored and compared to those without the trap experiment. We observed that the volume of the generated gas decreased by a factor of two in the presence of the NaOH

---

[3] a) Z. L. Wang, J.M. Yan, Y. Ping, H.L. Wang, W.T. Zheng, Q. Jiang, *Angew. Chem. Int. Ed.* **2013**, 52, 4406;  
b) Zhang, Ö. Metin, D. Su, S. Sun, *Angew. Chem. Int. Ed.* **2013**, 52, 3681.

[4] X. Gu, Z-H. Lu, H-L. Jiang, T. Akita, Q. Xu, *J. Am. Chem. Soc.* **2011**, 133, 11822.

trap. This result is indicative of the complete adsorption of CO<sub>2</sub> in NaOH solution (1) and the presence of equivalent molar amounts of CO<sub>2</sub> and H<sub>2</sub> (1.0:1.0) in the product mixture of the CrAuPd/N-SiO<sub>2</sub> catalyzed additive-free FA dehydrogenation.

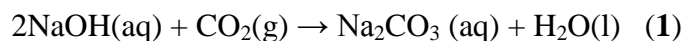

#### *S.7 Testing the Recyclability Performance of CrAuPd/N-SiO<sub>2</sub> Catalyst*

The recyclability of CrAuPd/N-SiO<sub>2</sub> in the dehydrogenation of FA was determined by a series of experiments started with aqueous FA solution (0.20 M in 10.0 mL H<sub>2</sub>O) at 298 K. When the complete conversion is achieved, immediately, another equivalent of FA was added to leading further hydrogen evolution from the reaction mixture. The same procedure was followed up to 5<sup>th</sup> catalytic recycle.

#### *S.8 Isolability and Reusability Performance of CrAuPd/N-SiO<sub>2</sub> Catalyst*

After the first run of catalytic dehydrogenation of aqueous FA solution starting with CrAuPd/N-SiO<sub>2</sub> at 298 K, the catalyst was isolated from reaction solution by centrifugation and washed with excess water, then dried at 373 K. The dried catalyst was weighted and used again in the catalytic dehydrogenation of aqueous FA solution (0.20 M in 10.0 mL H<sub>2</sub>O) solution at 298 K. The same procedure was followed up to 5<sup>th</sup> catalytic reuse.

**Table S1.** Comparison of the catalytic performance of CrAuPd/N-SiO<sub>2</sub> catalyst with the prior best heterogeneous catalyst systems reported for the dehydrogenation of FA in the absence of any additives at  $\leq 298$  K (references cited herein are those taken from manuscript).

| Catalyst                                | Temp.(K) | Con. (%) | Activity <sup>[a]</sup> | Reference  |
|-----------------------------------------|----------|----------|-------------------------|------------|
| Ag@Pd                                   | 293      | 36       | 63                      | [8a]       |
| AgPd                                    | 293      | 10       | 72                      | [8a]       |
| Ag@Pd/C                                 | 293      | 44       | 96                      | [8a]       |
| Au@Pd/N-rGO                             | 298      | 89       | 98                      | [8b]       |
| CoAuPd/C                                | 298      | 91       | 37                      | [8c]       |
| CoAuPd/r-GO                             | 298      | 51       | 45                      | [8d]       |
| CoAuPd/DNA                              | 298      | 96       | 85                      | [8d]       |
| AuPd                                    | 298      | 28       | 41                      | [8e]       |
| AgPd                                    | 298      | 52       | 150                     | [8f]       |
| Pd-MnO <sub>x</sub> /N-SiO <sub>2</sub> | 293      | 80       | 140                     | [8g]       |
| CrAuPd/N-SiO <sub>2</sub>               | 298      | 100      | 730                     | this study |

[a] *initial* TOF values (TOF = mol H<sub>2</sub> / mol catalyst  $\times$  time (h)) calculated at  $\sim 20$  % of conversion achieved.

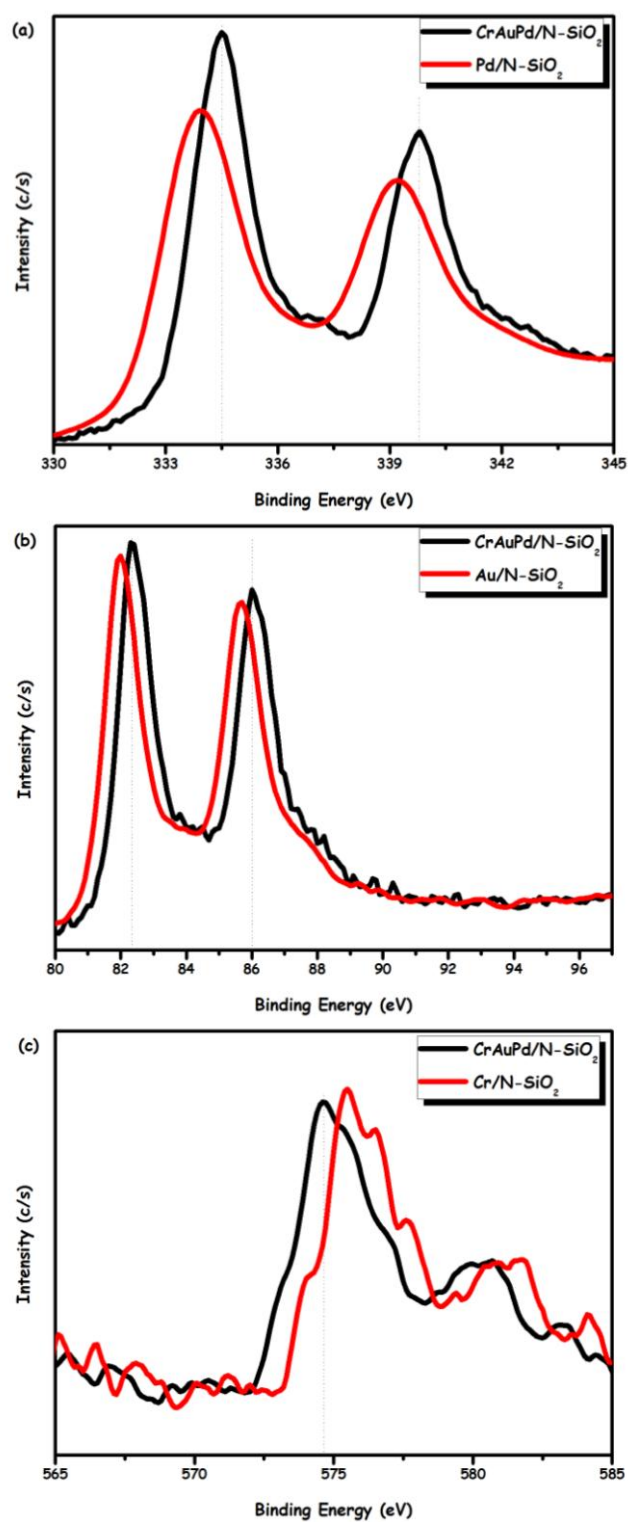

**Figure S1.** The high resolution (a) Pd 3d XPS spectrum for CrAuPd/N-SiO<sub>2</sub> and Pd/N-SiO<sub>2</sub> (b) Au 4f XPS spectrum for CrAuPd/N-SiO<sub>2</sub> and Pd/N-SiO<sub>2</sub>, and (c) Cr 2p XPS spectrum for CrAuPd/N-SiO<sub>2</sub> and Au/N-SiO<sub>2</sub>.

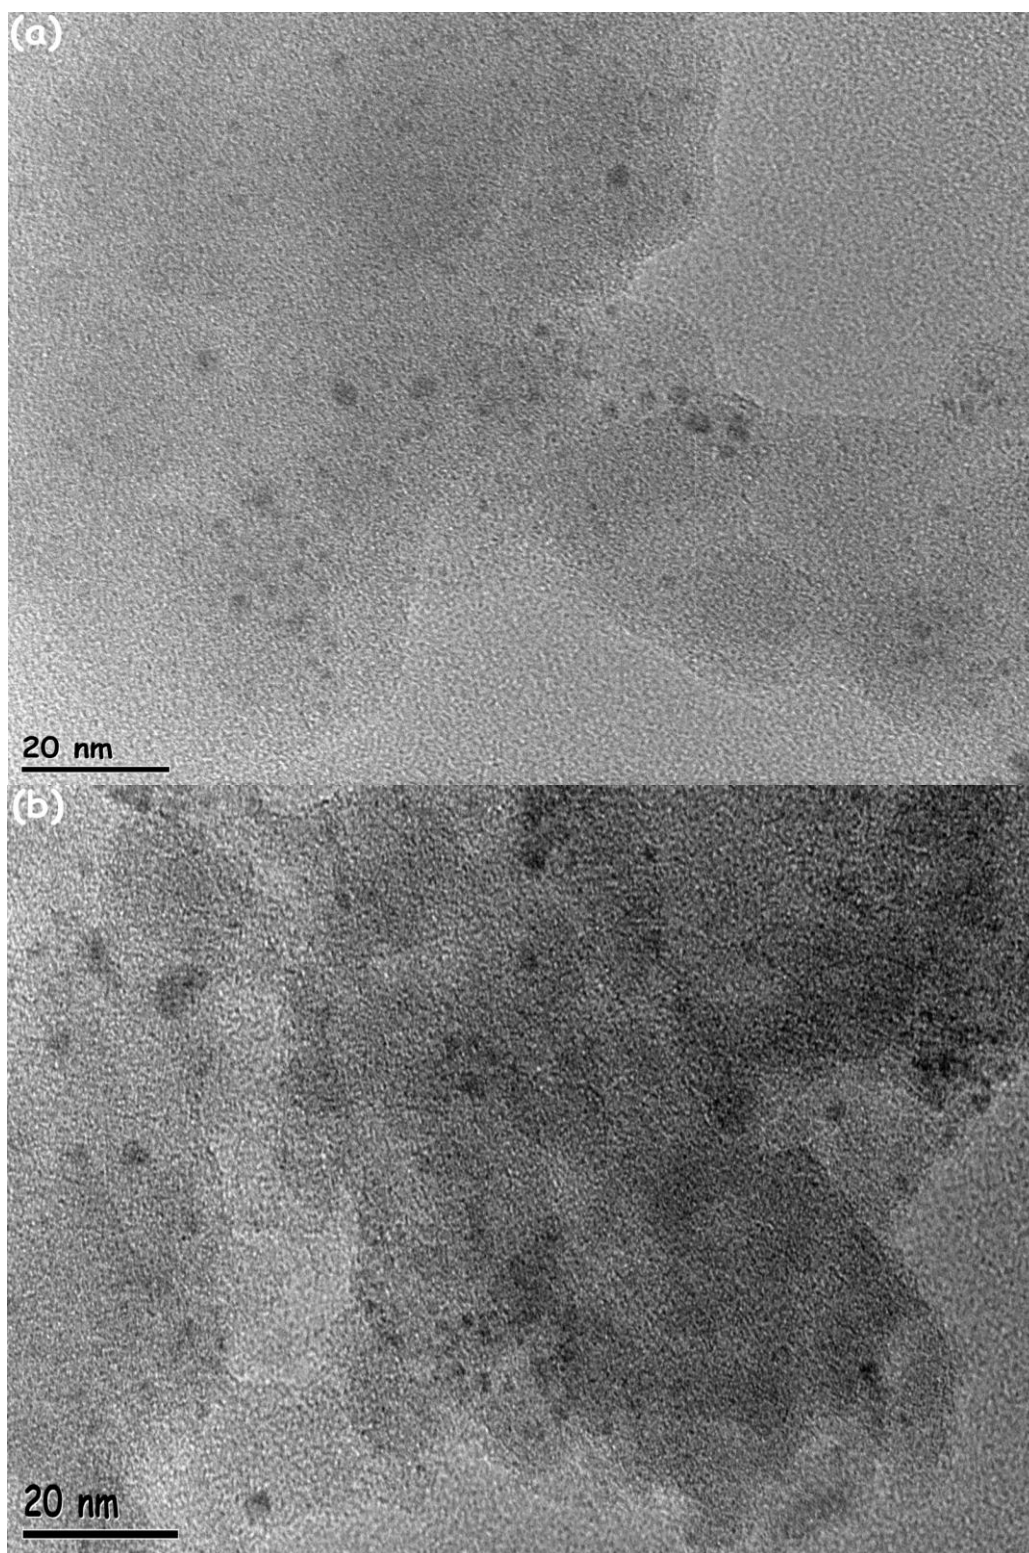

**Figure S2.** CTEM images of (a)  $\text{Pd}_{1.0}/\text{N-SiO}_2$  and (b)  $\text{Au}_{0.45}\text{Pd}_{0.55}/\text{N-SiO}_2$  catalysts.



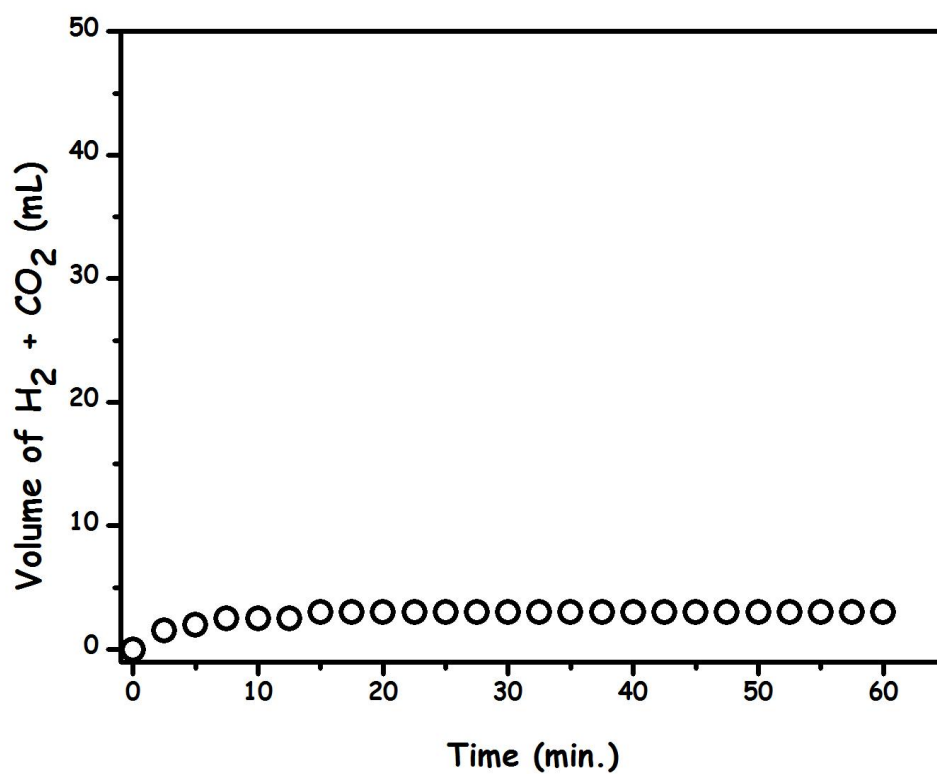

**Figure S3.** The volume of gas (CO<sub>2</sub> + H<sub>2</sub>) (mL) versus time (min.) graph for the dehydrogenation of aqueous FA solution (0.20 M in 10.0 mL H<sub>2</sub>O) catalyzed by the physical mixture of Cr<sub>0.17</sub>/N-SiO<sub>2</sub> Au<sub>0.23</sub>/N-SiO<sub>2</sub> and Pd<sub>0.60</sub>/N-SiO<sub>2</sub> catalysts at 298 K.

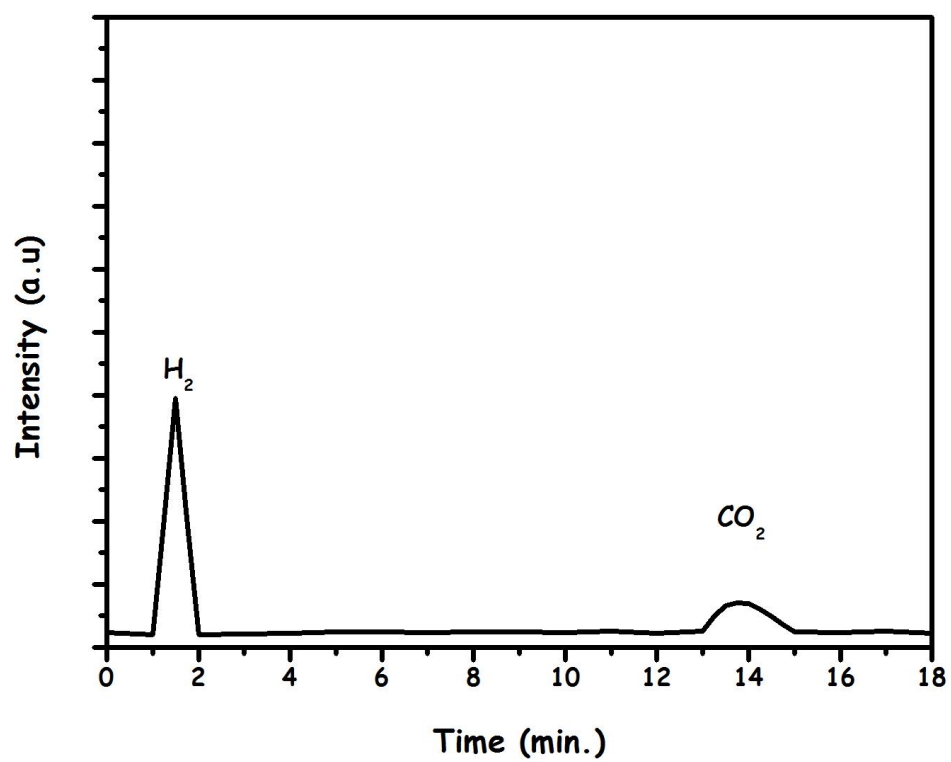

**Figure S4.** The gas chromatogram (GC/TCD) of the evolved gas from aqueous FA solution (0.20 M in 10.0 mL H<sub>2</sub>O) over Cr<sub>0.15</sub>Au<sub>0.25</sub>Pd<sub>0.60</sub>/N-SiO<sub>2</sub> catalyst at 298 K.

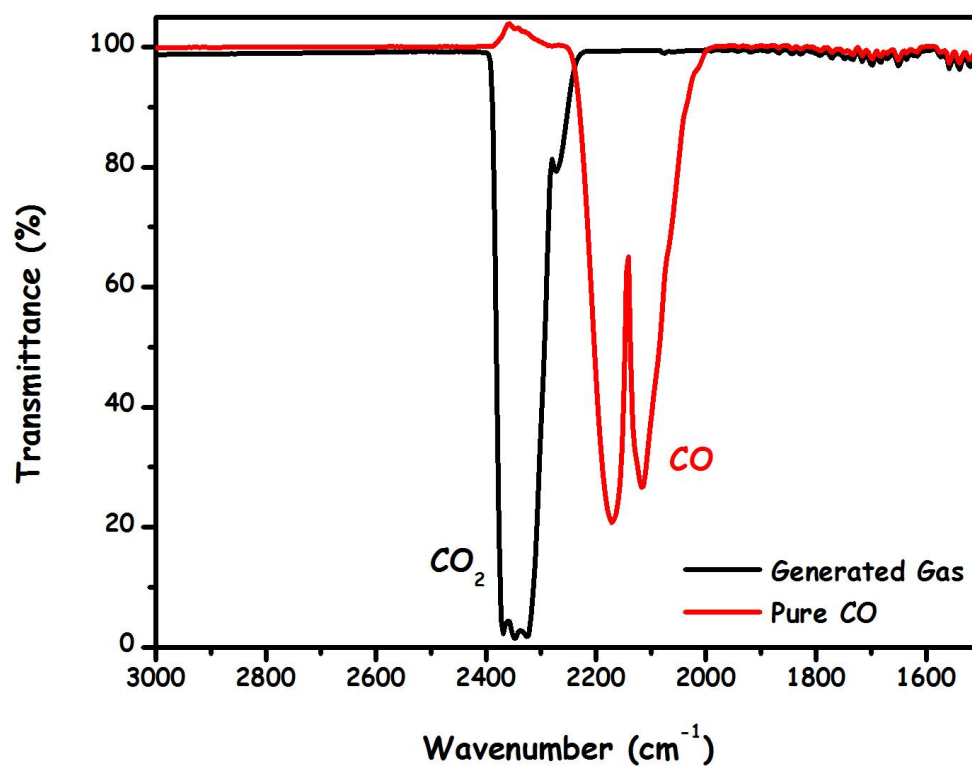

**Figure S5.** FTIR spectra of the pure CO and generated gas from aqueous FA solution (0.20 M in 10.0 mL H<sub>2</sub>O) over Cr<sub>0.15</sub>Au<sub>0.25</sub>Pd<sub>0.60</sub>/N-SiO<sub>2</sub> catalyst at 298 K.

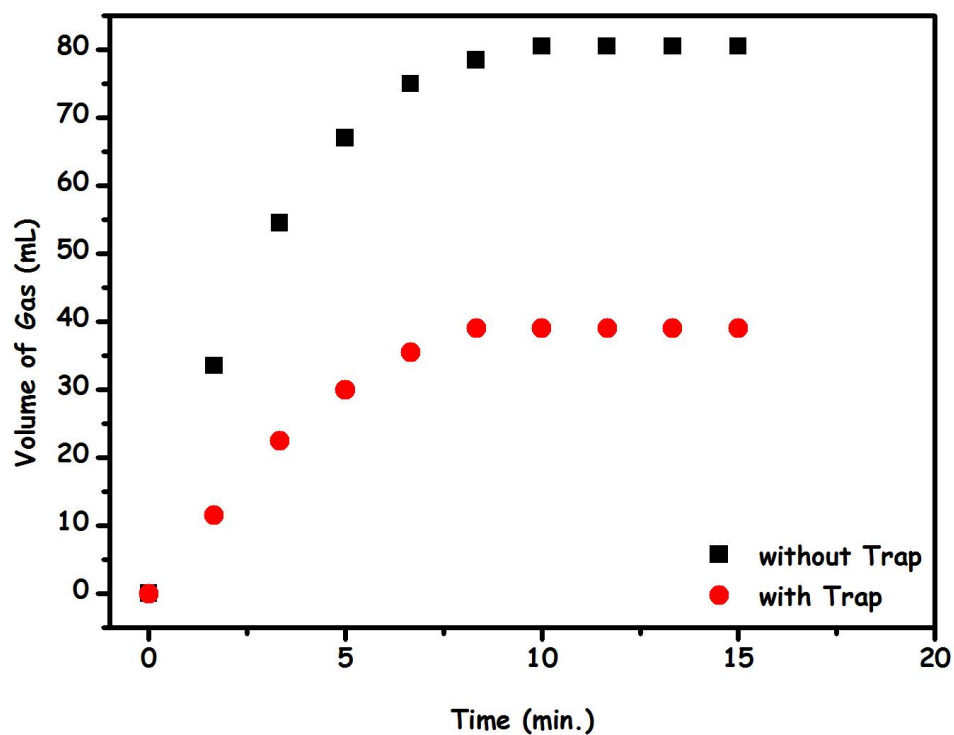

**Figure S6.** The volume of gas ( $\text{CO}_2 + \text{H}_2$ ) (mL) versus time (min.) graph for  $\text{Cr}_{0.15}\text{Au}_{0.25}\text{Pd}_{0.60}/\text{N-SiO}_2$  ( $[\text{CrAuPd}] = 4.0 \text{ mM}$ ) catalyzed dehydrogenation of aqueous FA solution ( $0.20 \text{ M}$  in  $10.0 \text{ mL H}_2\text{O}$ ) in the presence and absence of NaOH trap ( $[\text{NaOH}] = 10.0 \text{ M}$ ) at  $298 \text{ K}$ .

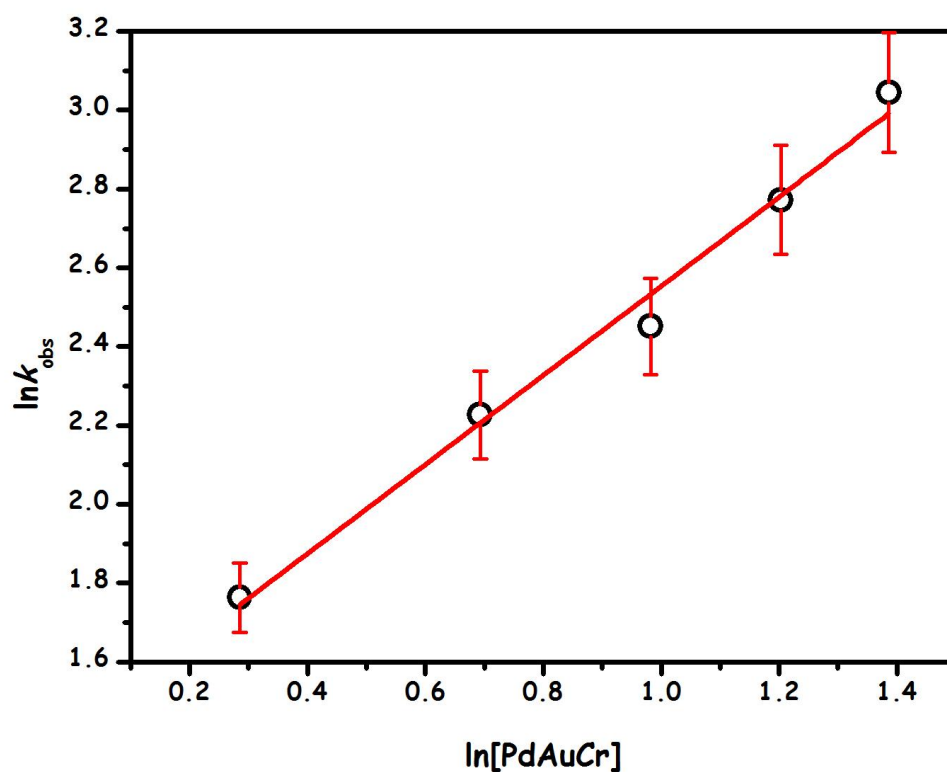

**Figure S7.** Plot of the observed rate constant ( $k_{\text{obs}}$ ) versus the catalyst concentration (both in logarithmic scale;  $y = 0.42 + 1.13x$  and  $R^2 = 0.987$ ) for the dehydrogenation of aqueous FA solution (0.20 M in 10.0 mL  $\text{H}_2\text{O}$ ) starting with different  $\text{Cr}_{0.15}\text{Au}_{0.25}\text{Pd}_{0.60}/\text{N-SiO}_2$  concentrations at 298 K.

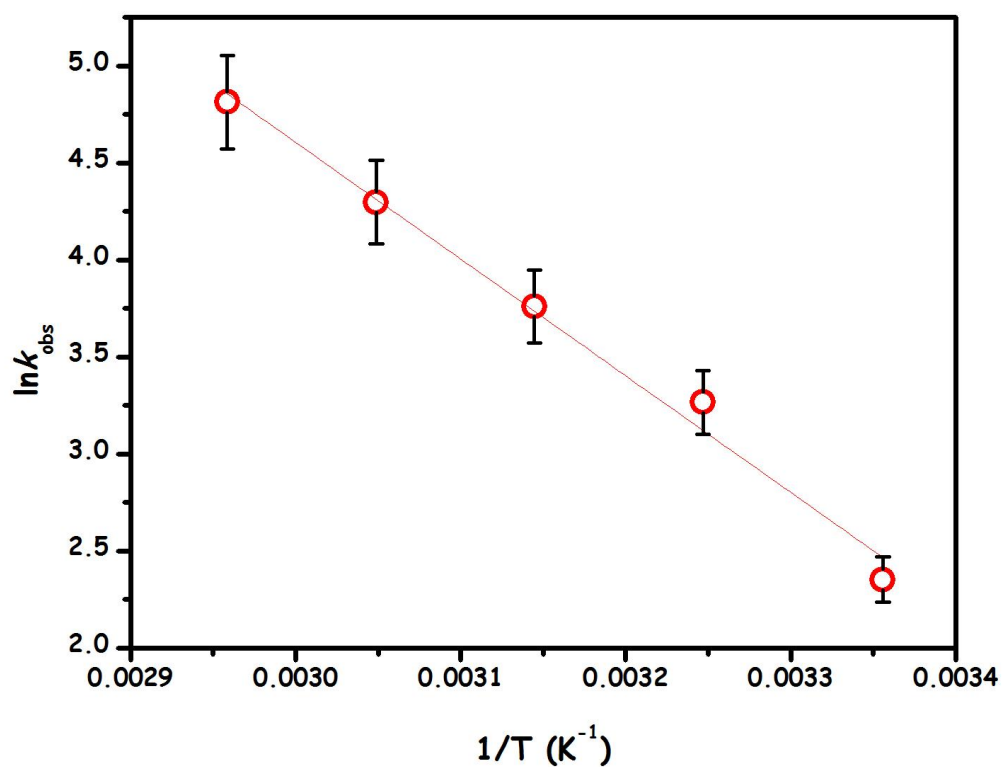

**Figure S8.** Arrhenius plot ( $y = 22.7 - 6000 x$  and  $R^2 = 0.96$ ) for  $\text{Cr}_{0.15}\text{Au}_{0.25}\text{Pd}_{0.60}/\text{N-SiO}_2$  (2.67 mM) catalyzed dehydrogenation of aqueous FA solution (0.20 M in 10.0 mL  $\text{H}_2\text{O}$ ) at different temperatures.

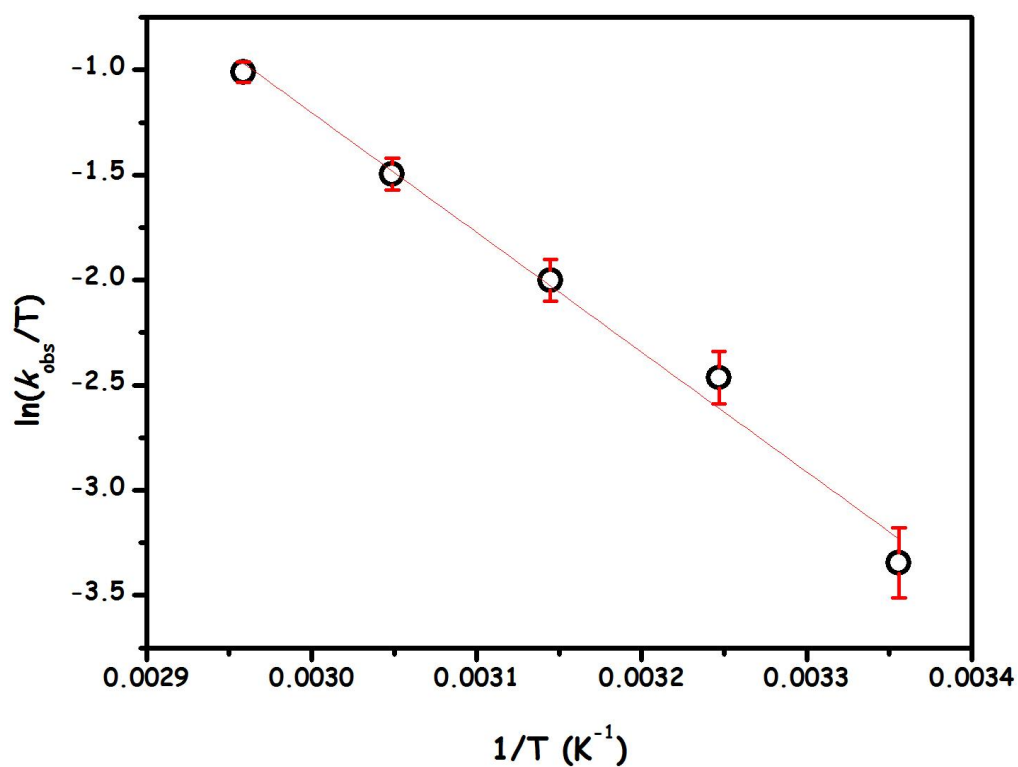

**Figure S9.** Eyring plot ( $y = 15.9 - 5700 x$  and  $R^2 = 0.96$ ) for  $\text{Cr}_{0.15}\text{Au}_{0.25}\text{Pd}_{0.60}/\text{N-SiO}_2$  (2.67 mM) catalyzed dehydrogenation of aqueous FA solution (0.20 M in 10.0 mL  $\text{H}_2\text{O}$ ) at different temperatures.

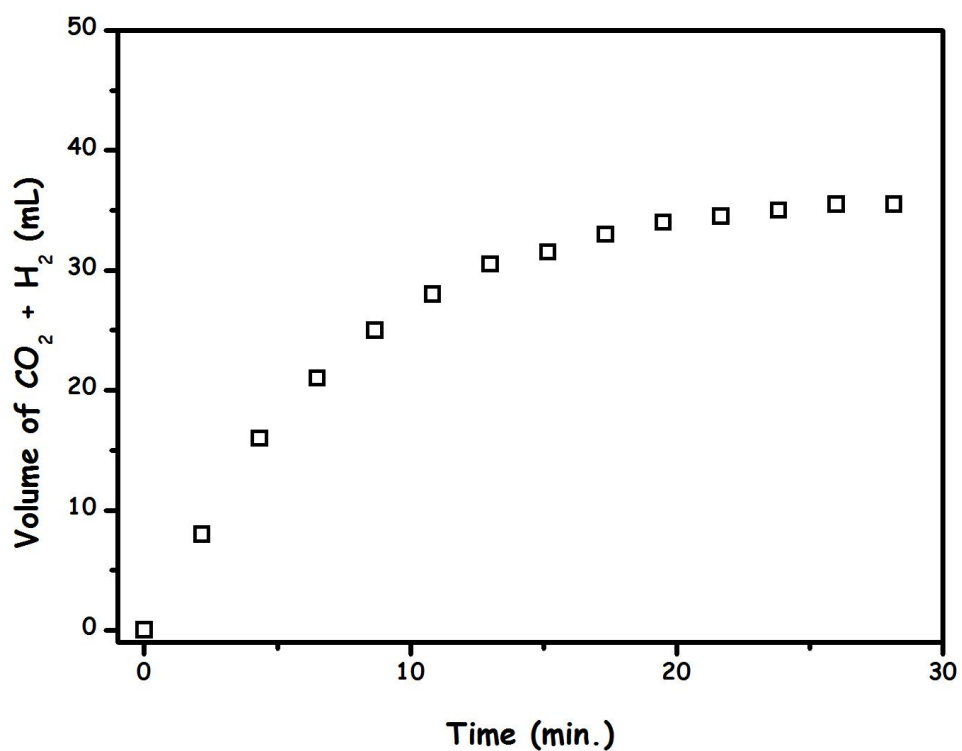

**Figure S10.** The volume of gas (CO<sub>2</sub> + H<sub>2</sub>) (mL) versus time (min.) graph for Cr<sub>0.13</sub>Au<sub>0.27</sub>Pd<sub>0.60</sub>/SiO<sub>2</sub> ([CrAuPd] = 4.0 mM) catalyzed dehydrogenation of aqueous FA solution (0.20 M in 10.0 mL H<sub>2</sub>O) at 298 K.



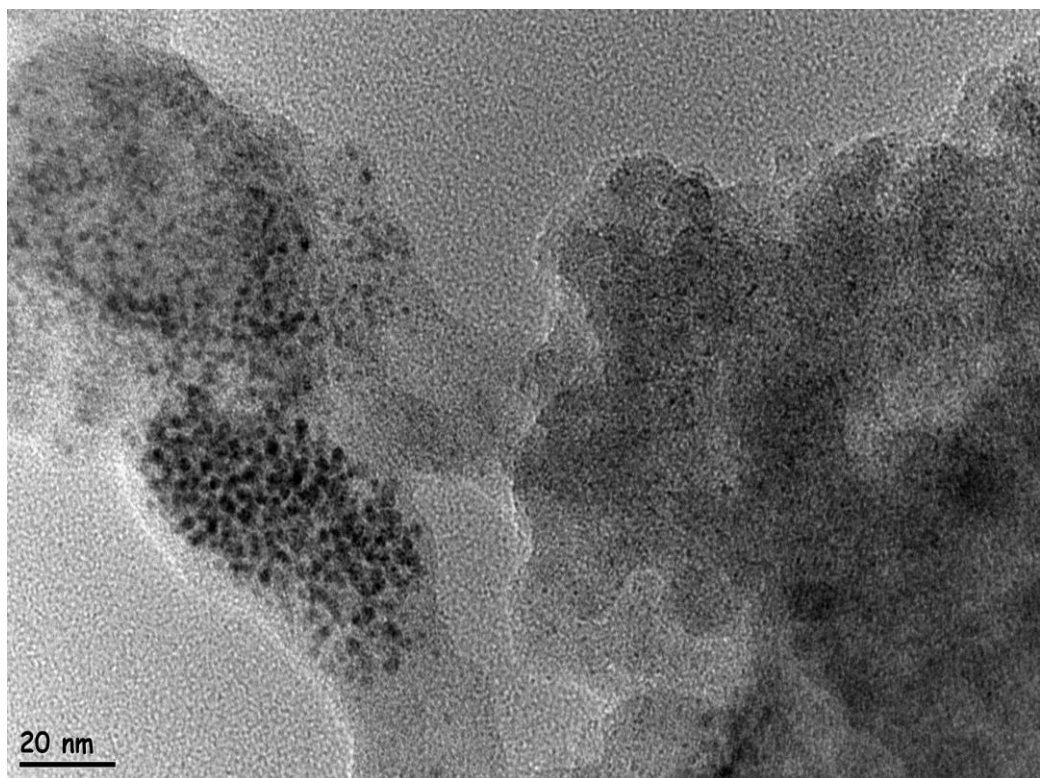

**Figure S11.** CTEM image of Cr<sub>0.13</sub>Au<sub>0.27</sub>Pd<sub>0.60</sub>/SiO<sub>2</sub>.

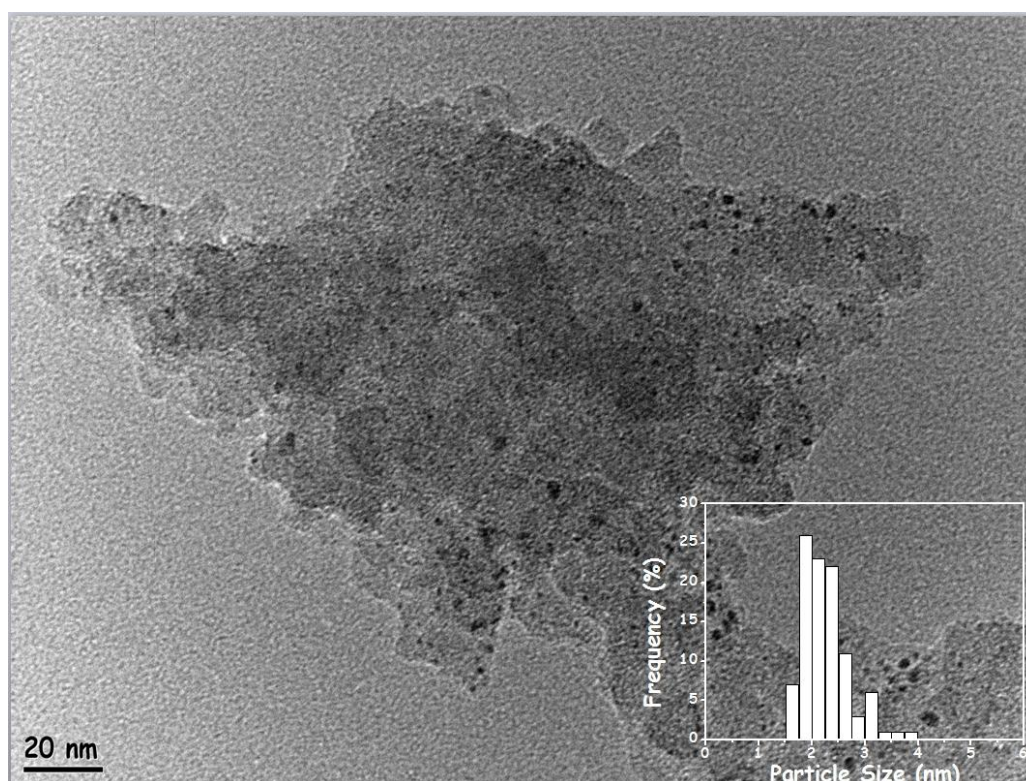

**Figure S12.** CTEM image and corresponding size histogram of  $\text{Cr}_{0.15}\text{Au}_{0.25}\text{Pd}_{0.60}/\text{N-SiO}_2$  recovered after 5<sup>th</sup> catalytic recycle.

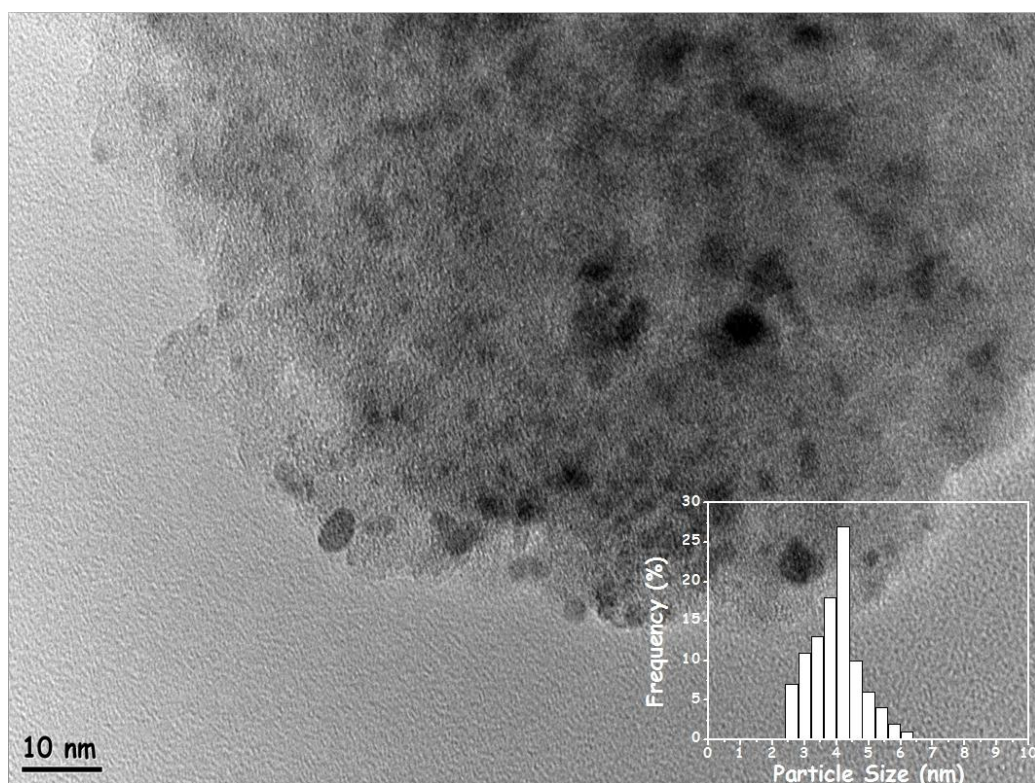

**Figure S13.** CTEM image and corresponding size histogram of  $\text{Cr}_{0.15}\text{Au}_{0.25}\text{Pd}_{0.60}/\text{N-SiO}_2$  recovered after 5<sup>th</sup> catalytic reuse.

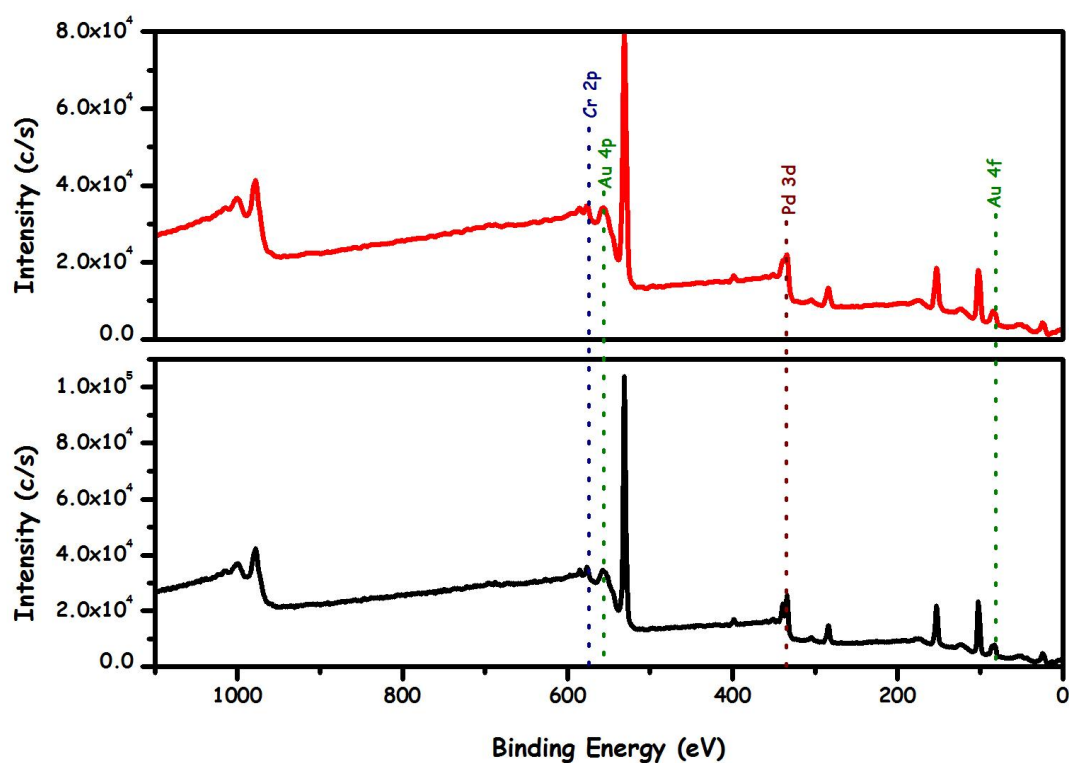

**Figure S14.** The survey XPS spectrum of reused (up; red) and fresh (down; black) CrAuPd/N-SiO<sub>2</sub> catalyst. The signals at 574, 340, 334.5, 86 and 82.4 eV assignable to Cr(0) (2p<sub>1/2</sub>), Pd(0) (3d<sub>3/2</sub>), Pd(0) (3d<sub>5/2</sub>), Au(0) (4f<sub>7/2</sub>) and Au(0) (4f<sub>5/2</sub>), respectively.<sup>[5]</sup>

[5] C. Wagner, W. M. Riggs, L. E. Davis, J. F. Moulder, G. E. Muilenberg, Handbook of X-ray Photoelectron Spectroscopy; Physical Electronic Division, Perkin-Elmer: Waltham, MA, 1979, 44.
